# Supplementary material for: Validation of a Spanish version of the health-related quality of life (HRQoL) measure for Chronic Otitis Media (COMQ-12)
Source: Springer Nature journal article supplement (doi:10.1186/s12955-020-01616-5), 2020-11-10
Supplement: MOESM1 [file 18573334]

## ESCALA COMQ-12

### **Cuestionario de Otitis Media Crónica (COMQ-12):**

Estas preguntas tienen por objeto averiguar qué tanto lo afecta su problema del oído. Ningún aparato puede hacerlo: solo usted puede explicarnos cómo se siente. Esperamos que los resultados de este cuestionario nos ayuden a comprender cuál de los síntomas en su oído es el más importante para usted. Al saber esto podemos mejorar las formas de atención a los pacientes con problemas del oído.

Por favor responda las siguientes preguntas considerando cuidadosamente cada pregunta y marcando el número correspondiente. Cada número se refiere a una descripción específica. No hay respuestas correctas ni incorrectas. Simplemente trate de pensar cuidadosamente cada pregunta antes de marcar el número que considere apropiado. Considere cada problema y responda si ha sentido alguno de estos síntomas durante **LOS ÚLTIMOS 6 MESES**.

### **EJEMPLO:**

Para la siguiente pregunta por favor indique con qué frecuencia usted realiza esta actividad aplicando la escala indicada y marcando el número correspondiente con una X:

| EN LOS ULTIMOS 6 MESES:                              | nunca | al menos una vez cada 3 meses | al menos una vez al mes | al menos una vez a la semana | casi todos los días de la semana | todo el tiempo |
|------------------------------------------------------|-------|-------------------------------|-------------------------|------------------------------|----------------------------------|----------------|
|                                                      | 0     | 1                             | 2                       | 3                            | 4                                | 5              |
| ¿Con que frecuencia se come una tostada al desayuno? |       |                               | X                       |                              |                                  |                |

Una persona que responde así dice que generalmente se come una tostada al desayuno, al menos una vez al mes. Si usted tiene algún problema para responder a las preguntas por favor pídale ayuda a algún miembro del personal de la clínica.

**Gracias.**

## SEVERIDAD DE LOS SÍNTOMAS

Para las siguientes preguntas por favor indique que tanto lo afectaron a usted los siguientes síntomas. Use la escala descrita a continuación y marque el número que corresponda con una equis (X).

| EN LOS ULTIMOS 6 MESES<br>Que tanto le molestó o afectó:                                                     | no me afectó o no me molestó para nada | fue una molestia menor | fue una molestia moderada | fue una molestia grave, pero la pude manejar | fue una molestia grave y me costó trabajo manejarla | la peor cosa que me ha afectado en mi vida |
|--------------------------------------------------------------------------------------------------------------|----------------------------------------|------------------------|---------------------------|----------------------------------------------|-----------------------------------------------------|--------------------------------------------|
|                                                                                                              | 0                                      | 1                      | 2                         | 3                                            | 4                                                   | 5                                          |
| 1. Las secreciones o el drenaje del oído                                                                     |                                        |                        |                           |                                              |                                                     |                                            |
| 2. El mal olor del oído                                                                                      |                                        |                        |                           |                                              |                                                     |                                            |
| 3. Los problemas para oír en la casa que requieren, por ejemplo, que suba el volumen de la TV o del radio    |                                        |                        |                           |                                              |                                                     |                                            |
| 4. Los problemas para oír cuando hablo con varias personas o en grupos o cuando el medio ambiente es ruidoso |                                        |                        |                           |                                              |                                                     |                                            |
| 5. Molestias dentro y alrededor del oído                                                                     |                                        |                        |                           |                                              |                                                     |                                            |
| 6. Los mareos o sensación de "pérdida del equilibrio"                                                        |                                        |                        |                           |                                              |                                                     |                                            |
| 7. Tinnitus o ruidos en el oído                                                                              |                                        |                        |                           |                                              |                                                     |                                            |

## ASPECTOS GENERALES

Para las siguientes preguntas por favor indique que ***tan mal se ha sentido en su estado de ánimo***. En una escala de 0 a 5 donde 0 significa que no le molesta y 5 significa que se ha sentido muy mal.

**EN LOS ULTIMOS 6 MESES:**  
Que tan mal se ha sentido en su estado de ánimo

Hasta qué punto sus problemas del oído lo "han hecho sentir mal". Marque con una equis (X) la opción que corresponda

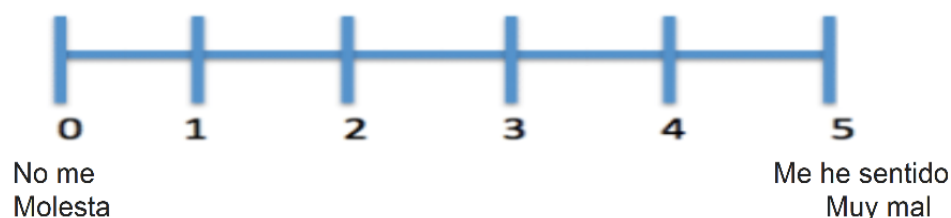

## IMPACTO EN EL ESTILO DE VIDA Y EL TRABAJO

**Para las siguientes preguntas** por favor indique **que tan frecuente o con qué frecuencia** lo afectaron a usted los siguientes problemas.

Use la escala descrita abajo y marque el número que corresponda con una equis (X)

| EN LOS ULTIMOS 6 MESES Con qué frecuencia, por su problema de oído, usted NO pudo:                                                                                                | NINGUNA VEZ en los últimos 6 MESES | POR LO MENOS UNA VEZ en los últimos 6 MESES | POR LO MENOS UNA VEZ en los últimos 3 MESES | POR LO MENOS UNA VEZ en el último MES | POR LO MENOS UNA VEZ por SEMANA | la mayor parte DE LOS DÍAS DE LA SEMANA |
|-----------------------------------------------------------------------------------------------------------------------------------------------------------------------------------|------------------------------------|---------------------------------------------|---------------------------------------------|---------------------------------------|---------------------------------|-----------------------------------------|
|                                                                                                                                                                                   | 0                                  | 1                                           | 2                                           | 3                                     | 4                               | 5                                       |
| 1. ¿Realizar sus actividades diarias normales en casa o en el trabajo?                                                                                                            |                                    |                                             |                                             |                                       |                                 |                                         |
| 2. Debido a su problema en el oído, ¿con qué frecuencia o que tanto a usted le da miedo bañarse, ducharse o realizar actividades en el agua por miedo a una infección en el oído? |                                    |                                             |                                             |                                       |                                 |                                         |

## IMPACTO EN EL SERVICIO DE SALUD

**Para las siguientes preguntas** por favor indique **que tan frecuente o con qué frecuencia** lo afectaron a usted los siguientes problemas.

Use la escala descrita abajo y marque el número que corresponda con una equis (X)

| EN LOS ULTIMOS 6 MESES (Impacto en el Servicio de Salud)                                                                     | NINGUNA VEZ en los últimos 6 MESES | POR LO MENOS UNA VEZ en los últimos 6 MESES | POR LO MENOS UNA VEZ en los últimos 3 MESES | POR LO MENOS UNA VEZ en el último MES | POR LO MENOS UNA VEZ por SEMANA | la mayor parte DE LOS DÍAS DE LA SEMANA |
|------------------------------------------------------------------------------------------------------------------------------|------------------------------------|---------------------------------------------|---------------------------------------------|---------------------------------------|---------------------------------|-----------------------------------------|
|                                                                                                                              | 0                                  | 1                                           | 2                                           | 3                                     | 4                               | 5                                       |
| 1. ¿Con qué frecuencia o que tanto visitó a su médico a causa de los problemas en su oído?:                                  |                                    |                                             |                                             |                                       |                                 |                                         |
| 2. ¿Con qué frecuencia o que tanto tiene que tomar medicamentos (incluyendo gotas para el oído) para sus problemas del oído? |                                    |                                             |                                             |                                       |                                 |                                         |
