# Supplementary material for: Validation of a Spanish version of the health-related quality of life (HRQoL) measure for Chronic Otitis Media (COMQ-12)
Source: Springer Nature journal article supplement (doi:10.1186/s12955-020-01616-5), 2020-11-10
Supplement: MOESM2 [file 18573334]

```

-----
name: <unnamed>
log: C:\Users\smmor\Desktop\Análisis factorial adicional COMQ-12 03 jul 2020.log
log type: text
opened on: 3 Jul 2020, 18:12:32

```

```

.
. *****FACTOR ANALISIS SAMPLE SIZE COMPLETE
.
. *bartlett test
.
. factortest prellassecrecionesoeldrena - prellconquéfrecuenciaioque

```

```

Determinant of the correlation matrix
Det = 0.021

```

Bartlett test of sphericity

```

Chi-square = 749.170
Degrees of freedom = 55
p-value = 0.000
H0: variables are not intercorrelated

```

```

Kaiser-Meyer-Olkin Measure of Sampling Adequacy
KMO = 0.849

```

```

.
. *policóric Matrix
.
. polychoric prellassecrecionesoeldrena - prellconquéfrecuenciaioque

```

Polychoric correlation matrix

|                             | prellassecrecionesoeldrena | pre2elmalolordeloido | pre3losproblemasparaoiren |
|-----------------------------|----------------------------|----------------------|---------------------------|
| prellassecrecionesoeldrena  | 1                          |                      |                           |
| pre2elmalolordeloido        | .66275044                  | 1                    |                           |
| pre3losproblemasparaoiren   | .50400075                  | .33879378            | 1                         |
| pre4losproblemasparaoirca   | .43312827                  | .3735871             | .79870284                 |
| pre5molestiasdentroyalreded | .43810102                  | .35581485            | .52326945                 |
| pre6losmareososensaciónde   | .37977622                  | .33432019            | .52977376                 |
| pre7tinnitusoruidoseneloi   | .4054954                   | .3414366             | .6800446                  |
| pre8conquéfrecuenciaioque   | .43819377                  | .27042993            | .3792038                  |
| pre9realizarsusactividades  | .32722622                  | .28191422            | .47825503                 |
| pre10debidoadsuproblemaene  | .255308                    | .13884614            | .21281281                 |
| prellconquéfrecuenciaioque  | .30961306                  | .24355824            | .35700507                 |

  

|                             | pre4losproblemasparaoirca | pre5molestiasdentroyalreded | pre6losmareososensaciónde |
|-----------------------------|---------------------------|-----------------------------|---------------------------|
| pre4losproblemasparaoirca   | 1                         |                             |                           |
| pre5molestiasdentroyalreded | .51645089                 | 1                           |                           |
| pre6losmareososensaciónde   | .49653723                 | .41998747                   | 1                         |
| pre7tinnitusoruidoseneloi   | .66035203                 | .51180435                   | .55420548                 |
| pre8conquéfrecuenciaioque   | .35319519                 | .23301642                   | .37952411                 |
| pre9realizarsusactividades  | .55065807                 | .23804182                   | .45616676                 |
| pre10debidoadsuproblemaene  | .11660919                 | .14539798                   | .36627558                 |
| prellconquéfrecuenciaioque  | .34804371                 | .20232351                   | .27865644                 |

  

|                            | pre7tinnitusoruidoseneloi | pre8conquéfrecuenciaioque | pre9realizarsusactividades |
|----------------------------|---------------------------|---------------------------|----------------------------|
| pre7tinnitusoruidoseneloi  | 1                         |                           |                            |
| pre8conquéfrecuenciaioque  | .34800812                 | 1                         |                            |
| pre9realizarsusactividades | .43167115                 | .4750009                  | 1                          |
| pre10debidoadsuproblemaene | .1840132                  | .47389529                 | .31376183                  |
| prellconquéfrecuenciaioque | .3169296                  | .48236896                 | .44417918                  |

  

|                            | pre10debidoadsuproblemaene | prellconquéfrecuenciaioque |
|----------------------------|----------------------------|----------------------------|
| pre10debidoadsuproblemaene | 1                          |                            |
| prellconquéfrecuenciaioque | .3520045                   | 1                          |

```

.
. matrix poly=r(R)
.
. *EFA without q12
.
. factormat poly, n(200) factor(3)
(obs=200)

```

```

Factor analysis/correlation
Method: principal factors      Number of obs = 200
Rotation: (unrotated)         Retained factors = 3
                               Number of params = 30

```

| Factor  | Eigenvalue | Difference | Proportion | Cumulative |
|---------|------------|------------|------------|------------|
| Factor1 | 4.53265    | 3.72416    | 0.8357     | 0.8357     |
| Factor2 | 0.80849    | 0.22228    | 0.1491     | 0.9848     |
| Factor3 | 0.58620    | 0.39120    | 0.1081     | 1.0928     |
| Factor4 | 0.19500    | 0.14025    | 0.0360     | 1.1288     |
| Factor5 | 0.05476    | 0.08367    | 0.0101     | 1.1389     |
| Factor6 | -0.02892   | 0.04257    | -0.0053    | 1.1335     |

|          |          |         |         |        |
|----------|----------|---------|---------|--------|
| Factor7  | -0.07149 | 0.03531 | -0.0132 | 1.1204 |
| Factor8  | -0.10680 | 0.04203 | -0.0197 | 1.1007 |
| Factor9  | -0.14883 | 0.03955 | -0.0274 | 1.0732 |
| Factor10 | -0.18837 | 0.02047 | -0.0347 | 1.0385 |
| Factor11 | -0.20884 | .       | -0.0385 | 1.0000 |

LR test: independent vs. saturated: chi2(55) = 1012.53 Prob>chi2 = 0.0000

Factor loadings (pattern matrix) and unique variances

| Variable    | Factor1 | Factor2 | Factor3 | Uniqueness |
|-------------|---------|---------|---------|------------|
| prellasseca | 0.6693  | 0.0333  | 0.4610  | 0.3384     |
| pre2elmalo  | 0.5458  | -0.0347 | 0.4841  | 0.4665     |
| pre3lospro  | 0.8147  | -0.2511 | -0.1568 | 0.2486     |
| pre4lospro  | 0.7975  | -0.3001 | -0.1858 | 0.2394     |
| pre5molest  | 0.5859  | -0.2444 | 0.0914  | 0.5886     |
| pre6losmar  | 0.6650  | 0.0286  | -0.0834 | 0.5500     |
| pre7tinnit  | 0.7347  | -0.2167 | -0.1321 | 0.3959     |
| pre8conque  | 0.5890  | 0.4258  | -0.0233 | 0.4712     |
| pre9realiz  | 0.6350  | 0.1981  | -0.1949 | 0.5196     |
| pre10debid  | 0.3884  | 0.4698  | -0.0481 | 0.6261     |
| pre11conqu  | 0.5105  | 0.3230  | -0.0817 | 0.6284     |

. rotate, factor(3) blank(0.25) varimax

Factor analysis/correlation                      Number of obs =            200  
Method: principal factors                      Retained factors =        3  
Rotation: orthogonal varimax (Kaiser off)    Number of params =      30

| Factor  | Variance | Difference | Proportion | Cumulative |
|---------|----------|------------|------------|------------|
| Factor1 | 3.01875  | 1.47811    | 0.5566     | 0.5566     |
| Factor2 | 1.54063  | 0.17267    | 0.2840     | 0.8406     |
| Factor3 | 1.36796  | .          | 0.2522     | 1.0928     |

LR test: independent vs. saturated: chi2(55) = 1012.53 Prob>chi2 = 0.0000

Rotated factor loadings (pattern matrix) and unique variances

| Variable    | Factor1 | Factor2 | Factor3 | Uniqueness |
|-------------|---------|---------|---------|------------|
| prellasseca | 0.3265  |         | 0.7109  | 0.3384     |
| pre2elmalo  | 0.2559  |         | 0.6762  | 0.4665     |
| pre3lospro  | 0.8181  |         |         | 0.2486     |
| pre4lospro  | 0.8404  |         |         | 0.2394     |
| pre5molest  | 0.5424  |         | 0.3412  | 0.5886     |
| pre6losmar  | 0.5336  | 0.3409  |         | 0.5500     |
| pre7tinnit  | 0.7293  |         |         | 0.3959     |
| pre8conque  | 0.2525  | 0.6369  |         | 0.4712     |
| pre9realiz  | 0.4680  | 0.4995  |         | 0.5196     |
| pre10debid  |         | 0.5910  |         | 0.6261     |
| pre11conqu  | 0.2654  | 0.5262  |         | 0.6284     |

(blanks represent abs(loading)<.25)

Factor rotation matrix

|         | Factor1 | Factor2 | Factor3 |
|---------|---------|---------|---------|
| Factor1 | 0.7760  | 0.4469  | 0.4451  |
| Factor2 | -0.5016 | 0.8651  | 0.0059  |
| Factor3 | -0.3824 | -0.2278 | 0.8955  |

. rotate, promax horst blanks(.3)

Factor analysis/correlation                      Number of obs =            200  
Method: principal factors                      Retained factors =        3  
Rotation: oblique promax (Kaiser on)        Number of params =      30

| Factor  | Variance | Proportion | Rotated factors are correlated |
|---------|----------|------------|--------------------------------|
| Factor1 | 4.01959  | 0.7411     |                                |
| Factor2 | 2.91809  | 0.5380     |                                |
| Factor3 | 2.65472  | 0.4895     |                                |

LR test: independent vs. saturated: chi2(55) = 1012.53 Prob>chi2 = 0.0000

Rotated factor loadings (pattern matrix) and unique variances

| Variable | Factor1 | Factor2 | Factor3 | Uniqueness |
|----------|---------|---------|---------|------------|
|----------|---------|---------|---------|------------|

```

-----+-----
prellassec~a |                0.7102 |      0.3384
pre2elmalo~o |                0.7121 |      0.4665
pre3lospro~n |      0.8467          |      0.2486
pre4lospro~a |      0.8984          |      0.2394
pre5molest~d |      0.5243          |      0.5886
pre6losmar~e |      0.4567          |      0.5500
pre7tinnit~i |      0.7486          |      0.3959
pre8conqué~e |                0.6704 |      0.4712
pre9realiz~s |      0.3665      0.4803 |      0.5196
pre10debid~e |                0.6650 |      0.6261
pre11conqu~e |                0.5478 |      0.6284
-----+-----

```

(blanks represent abs(loading)<.3)

Factor rotation matrix

```

-----+-----
| Factor1  Factor2  Factor3
-----+-----
Factor1 |  0.9298   0.7532   0.7240
Factor2 | -0.3104   0.6465  -0.0139
Factor3 | -0.1977  -0.1211   0.6897
-----+-----

```

```
. matrix factor=e(r_L)
```

```
. **Annexes
```

```
. *Comunality
```

```
. estat smc
```

Squared multiple correlations of variables with all other variables

```

-----+-----
Variable |      smc
-----+-----
prellassec~a |  0.5764
pre2elmalo~o |  0.4732
pre3lospro~n |  0.7156
pre4lospro~a |  0.7167
pre5molest~d |  0.3871
pre6losmar~e |  0.4496
pre7tinnit~i |  0.5591
pre8conqué~e |  0.4445
pre9realiz~s |  0.4539
pre10debid~e |  0.3233
pre11conqu~e |  0.3245
-----+-----

```

```
. *Goodness of fit
```

```
. estat factors, factors(3)
```

Factor analysis with different numbers of factors (maximum likelihood)

```

-----+-----
#factors |      loglik  df_m  df_r      AIC      BIC
-----+-----
1 | -125.829    11    44  273.6579  309.9394
2 |  -68.22127   21    34  178.4425  247.7072
3 |  -25.50172   30    25  111.0034  209.953
-----+-----

```

the model with 3 factors is a Heywood case

```
. *Correltaion Matrrix domains
```

```
. estat common
```

Correlation matrix of the promax(3) rotated common factors

```

-----+-----
Factors | Factor1  Factor2  Factor3
-----+-----
Factor1 |          1
Factor2 |   .5236          1
Factor3 |   .5411   .4528          1
-----+-----

```

```
. **CFA
```

```
. sem (Secrecionymalolor -> prellassecrecionesoeldrena, ) (Secrecionymalolor -> pre2elmalolordeloido, ) (Problemasauditivos ->
> pre3losproblemasparaoiren, ) (Problemasauditivos -> pre4losproblemasparaoircu, ) (Problemasauditivos -> pre5molestiasdentroy
> alredek, ) (Problemasauditivos -> pre6losmareososensaciónde, ) (Problemasauditivos -> pre7tinnitusoruidoseneloi, ) (Impactosa
> ludestilovida -> pre8conquéfrecuenciaoque, ) (Impactosaludestilovida -> pre9realizarsusactividades, ) (Impactosaludestilovida
> -> pre10debiduasuproblemaene, ) (Impactosaludestilovida -> pre11conquéfrecuenciaoque, ), covstruct(lexogenous, diagonal) la
> tent(Secrecionymalolor Problemasauditivos Impactosaludestilovida ) cov( Secrecionymalolor*Problemasauditivos Problemasauditiv
> os*Impactosaludestilovida Impactosaludestilovida*Secrecionymalolor) nocapslatent
```

Endogenous variables

Measurement: prellassecrecionesoeldrena pre2elmalolordeloido pre3losproblemasparaoiren pre4losproblemasparaoircua  
pre5molestiasdentroyalreded pre6losmareososensaciónde pre7tinnitusoruidoseneloi pre8conquéfrecuenciaioque  
pre9realizarsusactividades pre10debidoadsuproblemaene pre11conquéfrecuenciaioque

Exogenous variables

Latent: Secrecionymalolor Problemasauditivos Impactosaludestilovida

Fitting target model:

Iteration 0: log likelihood = -3791.8767  
Iteration 1: log likelihood = -3789.573  
Iteration 2: log likelihood = -3789.5228  
Iteration 3: log likelihood = -3789.5227

Structural equation model Number of obs = 200  
Estimation method = ml  
Log likelihood = -3789.5227

- ( 1) [prellassecrecionesoeldrena]Secrecionymalolor = 1
- ( 2) [pre3losproblemasparaoiren]Problemasauditivos = 1
- ( 3) [pre8conquéfrecuenciaioque]Impactosaludestilovida = 1

|                                                                                                     |                        | Coef.    | Std. Err.     | z     | P> z  | [95% Conf. Interval] |          |
|-----------------------------------------------------------------------------------------------------|------------------------|----------|---------------|-------|-------|----------------------|----------|
| Measurement                                                                                         |                        |          |               |       |       |                      |          |
| prellassecrecionesoeldrena                                                                          | Secrecionymalolor      | 1        | (constrained) |       |       |                      |          |
|                                                                                                     | _cons                  | 3.505    | .1034401      | 33.88 | 0.000 | 3.302261             | 3.707739 |
| pre2elmalolordeloido                                                                                | Secrecionymalolor      | .9226591 | .1484445      | 6.22  | 0.000 | .6317133             | 1.213605 |
|                                                                                                     | _cons                  | 3.23     | .1316641      | 24.53 | 0.000 | 2.971943             | 3.488057 |
| pre3losproblemasparaoiren                                                                           | Problemasauditivos     | 1        | (constrained) |       |       |                      |          |
|                                                                                                     | _cons                  | 3.82     | .0971493      | 39.32 | 0.000 | 3.629591             | 4.010409 |
| pre4losproblemasparaoircua                                                                          | Problemasauditivos     | .9104383 | .0690864      | 13.18 | 0.000 | .7750314             | 1.045845 |
|                                                                                                     | _cons                  | 3.91     | .0933247      | 41.90 | 0.000 | 3.727087             | 4.092913 |
| pre5molestiasdentroyalreded                                                                         | Problemasauditivos     | .7976832 | .098145       | 8.13  | 0.000 | .6053226             | .9900439 |
|                                                                                                     | _cons                  | 3.2      | .1159741      | 27.59 | 0.000 | 2.972695             | 3.427305 |
| pre6losmareososensaciónde                                                                           | Problemasauditivos     | .9636699 | .1183889      | 8.14  | 0.000 | .7316319             | 1.195708 |
|                                                                                                     | _cons                  | 2.525    | .1381914      | 18.27 | 0.000 | 2.25415              | 2.79585  |
| pre7tinnitusoruidoseneloi                                                                           | Problemasauditivos     | 1.073937 | .0969934      | 11.07 | 0.000 | .8838334             | 1.264041 |
|                                                                                                     | _cons                  | 3.415    | .1208878      | 28.25 | 0.000 | 3.178064             | 3.651936 |
| pre8conquéfrecuenciaioque                                                                           | Impactosaludestilovida | 1        | (constrained) |       |       |                      |          |
|                                                                                                     | _cons                  | 2.27     | .1287847      | 17.63 | 0.000 | 2.017587             | 2.522413 |
| pre9realizarsusactividades                                                                          | Impactosaludestilovida | .9373332 | .1411192      | 6.64  | 0.000 | .6607446             | 1.213922 |
|                                                                                                     | _cons                  | 2.635    | .1279018      | 20.60 | 0.000 | 2.384317             | 2.885683 |
| pre10debidoadsuproblemaene                                                                          | Impactosaludestilovida | .5520066 | .1092097      | 5.05  | 0.000 | .3379596             | .7660536 |
|                                                                                                     | _cons                  | 4.16     | .1179915      | 35.26 | 0.000 | 3.928741             | 4.391259 |
| pre11conquéfrecuenciaioque                                                                          | Impactosaludestilovida | .539203  | .0786025      | 6.86  | 0.000 | .3851449             | .6932611 |
|                                                                                                     | _cons                  | 3.03     | .0780737      | 38.81 | 0.000 | 2.876978             | 3.183022 |
| var(e.prellassecrecionesoeldrena)   .4071099   .2456579   .1247615   1.328443                       |                        |          |               |       |       |                      |          |
| var(e.pre2elmalolordeloido)   1.991902   .2867224   1.502252   2.641152                             |                        |          |               |       |       |                      |          |
| var(e.pre3losproblemasparaoiren)   .5201279   .0841954   .3787236   .7143284                        |                        |          |               |       |       |                      |          |
| var(e.pre4losproblemasparaoircua)   .6084056   .0829949   .4656693   .7948932                       |                        |          |               |       |       |                      |          |
| var(e.pre5molestiasdentroyalreded)   1.81988   .1956379   1.474138   2.246711                       |                        |          |               |       |       |                      |          |
| var(e.pre6losmareososensaciónde)   2.549459   .2767624   2.060838   3.153931                        |                        |          |               |       |       |                      |          |
| var(e.pre7tinnitusoruidoseneloi)   1.345614   .1636353   1.060252   1.707781                        |                        |          |               |       |       |                      |          |
| var(e.pre8conquéfrecuenciaioque)   1.715977   .2560137   1.280905   2.298824                        |                        |          |               |       |       |                      |          |
| var(e.pre9realizarsusactividades)   1.865038   .2554206   1.425982   2.439279                       |                        |          |               |       |       |                      |          |
| var(e.pre10debidoadsuproblemaene)   2.29652   .2473396   1.859491   2.836261                        |                        |          |               |       |       |                      |          |
| var(e.pre11conquéfrecuenciaioque)   .7535895   .0943918   .5895444   .9632813                       |                        |          |               |       |       |                      |          |
| var(Secrecionymalolor)   1.732862   .3206658   1.205728   2.490455                                  |                        |          |               |       |       |                      |          |
| var(Problemasauditivos)   1.367471   .1931539   1.03678   1.803638                                  |                        |          |               |       |       |                      |          |
| var(Impactosaludestilovida)   1.601123   .3415889   1.053966   2.432332                             |                        |          |               |       |       |                      |          |
| cov(Secrecionymalolor,Problemasauditivos)   .8469176   .146986   5.76   0.000   .5588303   1.135005 |                        |          |               |       |       |                      |          |

```
cov(Secrecionymalolor,Impactosaludestilovida) | .8709498 .1832529 4.75 0.000 .5117807 1.230119
cov(Problemasauditivos,Impactosaludestilovida) | .9404762 .164866 5.70 0.000 .6173447 1.263608
```

```
LR test of model vs. saturated: chi2(41) = 65.45, Prob > chi2 = 0.0090
```

```
. estimate store modelo3fact
```

```
. estat gof, stats(all)
```

| Fit statistic        | Value    | Description                              |
|----------------------|----------|------------------------------------------|
| Likelihood ratio     |          |                                          |
| chi2_ms(41)          | 65.445   | model vs. saturated                      |
| p > chi2             | 0.009    |                                          |
| chi2_bs(55)          | 770.355  | baseline vs. saturated                   |
| p > chi2             | 0.000    |                                          |
| Population error     |          |                                          |
| RMSEA                | 0.055    | Root mean squared error of approximation |
| 90% CI, lower bound  | 0.028    |                                          |
| upper bound          | 0.079    |                                          |
| pclose               | 0.354    | Probability RMSEA <= 0.05                |
| Information criteria |          |                                          |
| AIC                  | 7651.045 | Akaike's information criterion           |
| BIC                  | 7769.785 | Bayesian information criterion           |
| Baseline comparison  |          |                                          |
| CFI                  | 0.966    | Comparative fit index                    |
| TLI                  | 0.954    | Tucker-Lewis index                       |
| Size of residuals    |          |                                          |
| SRMR                 | 0.050    | Standardized root mean squared residual  |
| CD                   | 0.989    | Coefficient of determination             |

```
. factorformat poly, n(200) factor(3)
(obs=200)
```

```
Factor analysis/correlation          Number of obs = 200
Method: principal factors           Retained factors = 3
Rotation: (unrotated)              Number of params = 30
```

| Factor   | Eigenvalue | Difference | Proportion | Cumulative |
|----------|------------|------------|------------|------------|
| Factor1  | 4.53265    | 3.72416    | 0.8357     | 0.8357     |
| Factor2  | 0.80849    | 0.22228    | 0.1491     | 0.9848     |
| Factor3  | 0.58620    | 0.39120    | 0.1081     | 1.0928     |
| Factor4  | 0.19500    | 0.14025    | 0.0360     | 1.1288     |
| Factor5  | 0.05476    | 0.08367    | 0.0101     | 1.1389     |
| Factor6  | -0.02892   | 0.04257    | -0.0053    | 1.1335     |
| Factor7  | -0.07149   | 0.03531    | -0.0132    | 1.1204     |
| Factor8  | -0.10680   | 0.04203    | -0.0197    | 1.1007     |
| Factor9  | -0.14883   | 0.03955    | -0.0274    | 1.0732     |
| Factor10 | -0.18837   | 0.02047    | -0.0347    | 1.0385     |
| Factor11 | -0.20884   | .          | -0.0385    | 1.0000     |

```
LR test: independent vs. saturated: chi2(55) = 1012.53 Prob>chi2 = 0.0000
```

```
Factor loadings (pattern matrix) and unique variances
```

| Variable    | Factor1 | Factor2 | Factor3 | Uniqueness |
|-------------|---------|---------|---------|------------|
| prellasseca | 0.6693  | 0.0333  | 0.4610  | 0.3384     |
| pre2elmalo  | 0.5458  | -0.0347 | 0.4841  | 0.4665     |
| pre3lospro  | 0.8147  | -0.2511 | -0.1568 | 0.2486     |
| pre4lospro  | 0.7975  | -0.3001 | -0.1858 | 0.2394     |
| pre5molest  | 0.5859  | -0.2444 | 0.0914  | 0.5886     |
| pre6losmar  | 0.6650  | 0.0286  | -0.0834 | 0.5500     |
| pre7tinnit  | 0.7347  | -0.2167 | -0.1321 | 0.3959     |
| pre8conque  | 0.5890  | 0.4258  | -0.0233 | 0.4712     |
| pre9realiz  | 0.6350  | 0.1981  | -0.1949 | 0.5196     |
| pre10debid  | 0.3884  | 0.4698  | -0.0481 | 0.6261     |
| pre11conqu  | 0.5105  | 0.3230  | -0.0817 | 0.6284     |

```
. rotate, factor(3) blank(0.25) varimax
```

```
Factor analysis/correlation          Number of obs = 200
Method: principal factors           Retained factors = 3
Rotation: orthogonal varimax (Kaiser off) Number of params = 30
```

| Factor | Variance | Difference | Proportion | Cumulative |
|--------|----------|------------|------------|------------|
|--------|----------|------------|------------|------------|

| Factor  | 1       | 2       | 3      | 4      |
|---------|---------|---------|--------|--------|
| Factor1 | 3.01875 | 1.47811 | 0.5566 | 0.5566 |
| Factor2 | 1.54063 | 0.17267 | 0.2840 | 0.8406 |
| Factor3 | 1.36796 | .       | 0.2522 | 1.0928 |

LR test: independent vs. saturated:  $\chi^2(55) = 1012.53$  Prob> $\chi^2 = 0.0000$

Rotated factor loadings (pattern matrix) and unique variances

| Variable    | Factor1 | Factor2 | Factor3 | Uniqueness |
|-------------|---------|---------|---------|------------|
| prellasseca | 0.3265  |         | 0.7109  | 0.3384     |
| pre2elmalo  | 0.2559  |         | 0.6762  | 0.4665     |
| pre3lospro  | 0.8181  |         |         | 0.2486     |
| pre4lospro  | 0.8404  |         |         | 0.2394     |
| pre5molest  | 0.5424  |         | 0.3412  | 0.5886     |
| pre6losmar  | 0.5336  | 0.3409  |         | 0.5500     |
| pre7tinnit  | 0.7293  |         |         | 0.3959     |
| pre8conque  | 0.2525  | 0.6369  |         | 0.4712     |
| pre9realiz  | 0.4680  | 0.4995  |         | 0.5196     |
| pre10debid  |         | 0.5910  |         | 0.6261     |
| pre11conqu  | 0.2654  | 0.5262  |         | 0.6284     |

(blanks represent abs (loading) < .25)

Factor rotation matrix

|         | Factor1 | Factor2 | Factor3 |
|---------|---------|---------|---------|
| Factor1 | 0.7760  | 0.4469  | 0.4451  |
| Factor2 | -0.5016 | 0.8651  | 0.0059  |
| Factor3 | -0.3824 | -0.2278 | 0.8955  |

. rotate, promax horst blanks(.3)

Factor analysis/correlation                      Number of obs       =       200  
Method: principal factors                      Retained factors    =       3  
Rotation: oblique promax (Kaiser on)        Number of params   =       30

| Factor  | Variance | Proportion | Rotated factors are correlated |
|---------|----------|------------|--------------------------------|
| Factor1 | 4.01959  | 0.7411     |                                |
| Factor2 | 2.91809  | 0.5380     |                                |
| Factor3 | 2.65472  | 0.4895     |                                |

LR test: independent vs. saturated:  $\chi^2(55) = 1012.53$  Prob> $\chi^2 = 0.0000$

Rotated factor loadings (pattern matrix) and unique variances

| Variable    | Factor1 | Factor2 | Factor3 | Uniqueness |
|-------------|---------|---------|---------|------------|
| prellasseca |         |         | 0.7102  | 0.3384     |
| pre2elmalo  |         |         | 0.7121  | 0.4665     |
| pre3lospro  | 0.8467  |         |         | 0.2486     |
| pre4lospro  | 0.8984  |         |         | 0.2394     |
| pre5molest  | 0.5243  |         |         | 0.5886     |
| pre6losmar  | 0.4567  |         |         | 0.5500     |
| pre7tinnit  | 0.7486  |         |         | 0.3959     |
| pre8conque  |         | 0.6704  |         | 0.4712     |
| pre9realiz  | 0.3665  | 0.4803  |         | 0.5196     |
| pre10debid  |         | 0.6650  |         | 0.6261     |
| pre11conqu  |         | 0.5478  |         | 0.6284     |

(blanks represent abs (loading) < .3)

Factor rotation matrix

|         | Factor1 | Factor2 | Factor3 |
|---------|---------|---------|---------|
| Factor1 | 0.9298  | 0.7532  | 0.7240  |
| Factor2 | -0.3104 | 0.6465  | -0.0139 |
| Factor3 | -0.1977 | -0.1211 | 0.6897  |

\*\*\*Parallel Analysis

. fapara, reps(100)

PA -- Parallel Analysis for Factor Analysis -- N = 200  
PA Eigenvalues Averaged Over 100 Replications

|    | FA       | PA       | Dif      |
|----|----------|----------|----------|
| 1. | 4.532649 | .4532064 | 4.079443 |
| 2. | .8084863 | .3329512 | .4755351 |
| 3. | .5862035 | .2411771 | .3450265 |

```

4. .1950031 .162653 .0323501
5. .0547553 .0955798 -.0408245
6. -.0289196 .0284292 -.0573488
7. -.0714914 -.0328738 -.0386176
8. -.1067984 -.0887762 -.0180223
9. -.1488288 -.152416 .0035871
10. -.1883742 -.2147534 .0263792
11. -.2088436 -.2761805 .0673369

```

\*\*\*THE ANALYSIS SHOWS CONFIRMS THE MODEL WITH THREE FACTORS AND THE 11 INITIAL QUESTIONS OF THE SCALE

\*\*\*\*\*ANALYSIS WITH THE PARTITIONED SAMPLE

```

. set seed 512
.
. gen grupo = floor((2-1+1)*runiform() + 2)
.
. replace grupo=grupo-2
(200 real changes made)

. factortest prellassecrecionesoeldrena - prellconquéfrecuenciaoque if grupo==0

```

Determinant of the correlation matrix  
Det = 0.018

Bartlett test of sphericity

```

Chi-square = 379.063
Degrees of freedom = 55
p-value = 0.000
H0: variables are not intercorrelated

```

Kaiser-Meyer-Olkin Measure of Sampling Adequacy  
KMO = 0.834

```

. polychoric prellassecrecionesoeldrena - prellconquéfrecuenciaoque if grupo==0

```

Polychoric correlation matrix

```

prellassecrecionesoeldrena      prellassecrecionesoeldrena      pre2elmalolordeloido      pre3losproblemasparaoiren
prellassecrecionesoeldrena      1
pre2elmalolordeloido      .63882084      1
pre3losproblemasparaoiren      .51176697      .42220538      1
pre4losproblemasparaoirrcua      .4089081      .40236579      .77516204
pre5molestiasdentroyalreded      .44730226      .32211293      .45803287
pre6losmareososensaciónde      .39247615      .29498669      .55472498
pre7tinnitusoruidoseneloi      .40606689      .42707886      .6558389
pre8conquéfrecuenciaoque      .35939117      .23042408      .32183624
pre9realizarsusactividades      .48014346      .48801319      .55866965
pre10debidoasuproblemaene      .2000945      .08040282      .05074619
prellconquéfrecuenciaoque      .3714107      .26803619      .43265184

pre4losproblemasparaoirrcua      pre5molestiasdentroyalreded      pre6losmareososensaciónde
pre4losproblemasparaoirrcua      1
pre5molestiasdentroyalreded      .45983489      1
pre6losmareososensaciónde      .45111786      .31052967      1
pre7tinnitusoruidoseneloi      .59477907      .45610356      .5478254
pre8conquéfrecuenciaoque      .28985661      .16074349      .440085
pre9realizarsusactividades      .63060895      .38114702      .52925769
pre10debidoasuproblemaene      -.09270289      -.06059961      .26987992
prellconquéfrecuenciaoque      .30404889      .11511593      .27748393

pre7tinnitusoruidoseneloi      pre8conquéfrecuenciaoque      pre9realizarsusactividades
pre7tinnitusoruidoseneloi      1
pre8conquéfrecuenciaoque      .22111049      1
pre9realizarsusactividades      .52181502      .49096349      1
pre10debidoasuproblemaene      -.02614323      .49507833      .13019425
prellconquéfrecuenciaoque      .29464829      .38636611      .44151561

pre10debidoasuproblemaene      prellconquéfrecuenciaoque
pre10debidoasuproblemaene      1
prellconquéfrecuenciaoque      .29674857      1

```

```

. matrix poly2=r(R)

```

```

. *Análisis factorial sin la pregunta 12 (con base reducida)

```

```

. factormat poly2, n(100) factor(3)
(obs=100)

```

```

Factor analysis/correlation      Number of obs      =      100
Method: principal factors      Retained factors =      3

```

Rotation: (unrotated) Number of params = 30

| Factor   | Eigenvalue | Difference | Proportion | Cumulative |
|----------|------------|------------|------------|------------|
| Factor1  | 4.47471    | 3.42660    | 0.7951     | 0.7951     |
| Factor2  | 1.04812    | 0.58496    | 0.1862     | 0.9814     |
| Factor3  | 0.46316    | 0.26521    | 0.0823     | 1.0637     |
| Factor4  | 0.19795    | 0.07657    | 0.0352     | 1.0988     |
| Factor5  | 0.12138    | 0.06178    | 0.0216     | 1.1204     |
| Factor6  | 0.05960    | 0.08747    | 0.0106     | 1.1310     |
| Factor7  | -0.02787   | 0.08823    | -0.0050    | 1.1260     |
| Factor8  | -0.11610   | 0.05135    | -0.0206    | 1.1054     |
| Factor9  | -0.16746   | 0.01621    | -0.0298    | 1.0757     |
| Factor10 | -0.18367   | 0.05845    | -0.0326    | 1.0430     |
| Factor11 | -0.24212   | .          | -0.0430    | 1.0000     |

LR test: independent vs. saturated:  $\chi^2(55) = 507.93$  Prob> $\chi^2 = 0.0000$

Factor loadings (pattern matrix) and unique variances

| Variable     | Factor1 | Factor2 | Factor3 | Uniqueness |
|--------------|---------|---------|---------|------------|
| prellassec~a | 0.6851  | 0.0847  | 0.3992  | 0.3640     |
| pre2elmalo~o | 0.6026  | -0.0366 | 0.4115  | 0.4662     |
| pre3lospro~n | 0.8260  | -0.1885 | -0.1634 | 0.2555     |
| pre4lospro~a | 0.7668  | -0.3161 | -0.1841 | 0.2783     |
| pre5molest~d | 0.5292  | -0.2501 | 0.1073  | 0.6459     |
| pre6losmar~e | 0.6608  | 0.1359  | -0.2002 | 0.5048     |
| pre7tinnit~i | 0.7117  | -0.2418 | -0.0925 | 0.4265     |
| pre8conqu~e  | 0.5165  | 0.5071  | -0.1039 | 0.4653     |
| pre9realiz~s | 0.7718  | 0.0619  | -0.0422 | 0.3987     |
| pre10debid~e | 0.1925  | 0.6503  | -0.0196 | 0.5397     |
| pre11conqu~e | 0.4992  | 0.2842  | -0.0282 | 0.6693     |

. rotate, factor(3) blank(0.25) varimax

Factor analysis/correlation Number of obs = 100  
 Method: principal factors Retained factors = 3  
 Rotation: orthogonal varimax (Kaiser off) Number of params = 30

| Factor  | Variance | Difference | Proportion | Cumulative |
|---------|----------|------------|------------|------------|
| Factor1 | 3.21243  | 1.77763    | 0.5708     | 0.5708     |
| Factor2 | 1.43480  | 0.09603    | 0.2550     | 0.8258     |
| Factor3 | 1.33876  | .          | 0.2379     | 1.0637     |

LR test: independent vs. saturated:  $\chi^2(55) = 507.93$  Prob> $\chi^2 = 0.0000$

Rotated factor loadings (pattern matrix) and unique variances

| Variable     | Factor1 | Factor2 | Factor3 | Uniqueness |
|--------------|---------|---------|---------|------------|
| prellassec~a | 0.3558  |         | 0.6749  | 0.3640     |
| pre2elmalo~o | 0.3325  |         | 0.6443  | 0.4662     |
| pre3lospro~n | 0.8164  |         |         | 0.2555     |
| pre4lospro~a | 0.8284  |         |         | 0.2783     |
| pre5molest~d | 0.4864  |         | 0.3361  | 0.6459     |
| pre6losmar~e | 0.5666  | 0.3949  |         | 0.5048     |
| pre7tinnit~i | 0.7152  |         |         | 0.4265     |
| pre8conqu~e  | 0.2591  | 0.6645  |         | 0.4653     |
| pre9realiz~s | 0.6205  | 0.3330  | 0.3247  | 0.3987     |
| pre10debid~e |         | 0.6657  |         | 0.5397     |
| pre11conqu~e | 0.3031  | 0.4389  |         | 0.6693     |

(blanks represent abs(loading)<.25)

Factor rotation matrix

|         | Factor1 | Factor2 | Factor3 |
|---------|---------|---------|---------|
| Factor1 | 0.8134  | 0.3467  | 0.4671  |
| Factor2 | -0.4034 | 0.9147  | 0.0236  |
| Factor3 | -0.4191 | -0.2076 | 0.8839  |

. rotate, promax horst blanks(.3)

Factor analysis/correlation Number of obs = 100  
 Method: principal factors Retained factors = 3  
 Rotation: oblique promax (Kaiser on) Number of params = 30

| Factor | Variance | Proportion | Rotated factors are correlated |
|--------|----------|------------|--------------------------------|
|--------|----------|------------|--------------------------------|



|         | Factor1 | Factor2 | Factor3 |
|---------|---------|---------|---------|
| Factor1 | 4.05402 | 0.7204  |         |
| Factor2 | 2.91694 | 0.5183  |         |
| Factor3 | 2.18075 | 0.3875  |         |

LR test: independent vs. saturated:  $\chi^2(55) = 507.93$  Prob> $\chi^2 = 0.0000$

Rotated factor loadings (pattern matrix) and unique variances

| Variable     | Factor1 | Factor2 | Factor3 | Uniqueness |
|--------------|---------|---------|---------|------------|
| prellassec~a |         | 0.6883  |         | 0.3640     |
| pre2elmalo~o |         | 0.6854  |         | 0.4662     |
| pre3lospro~n | 0.8309  |         |         | 0.2555     |
| pre4lospro~a | 0.8850  |         |         | 0.2783     |
| pre5molest~d | 0.4255  |         |         | 0.6459     |
| pre6losmar~e | 0.5520  |         | 0.3465  | 0.5048     |
| pre7tinnit~i | 0.7218  |         |         | 0.4265     |
| pre8conqué~e |         |         | 0.6719  | 0.4653     |
| pre9realiz~s | 0.5359  |         |         | 0.3987     |
| pre10debid~e |         |         | 0.7236  | 0.5397     |
| pre11conqu~e |         |         | 0.4155  | 0.6693     |

(blanks represent abs(loading)<.3)

Factor rotation matrix

|         | Factor1 | Factor2 | Factor3 |
|---------|---------|---------|---------|
| Factor1 | 0.9408  | 0.7821  | 0.5765  |
| Factor2 | -0.2141 | 0.6232  | -0.1028 |
| Factor3 | -0.2629 | -0.0009 | 0.8106  |

. matrix factor2=e(r\_L)

. \*\*Adicionales

. \*Comunalidad

. estat smc

Squared multiple correlations of variables with all other variables

| Variable     | smc    |
|--------------|--------|
| prellassec~a | 0.5537 |
| pre2elmalo~o | 0.4769 |
| pre3lospro~n | 0.7239 |
| pre4lospro~a | 0.6952 |
| pre5molest~d | 0.3472 |
| pre6losmar~e | 0.4926 |
| pre7tinnit~i | 0.5464 |
| pre8conqué~e | 0.4604 |
| pre9realiz~s | 0.6009 |
| pre10debid~e | 0.3787 |
| pre11conqu~e | 0.3519 |

. \*Factores Bondad de ajuste

. estat factors, factors(3)

Factor analysis with different numbers of factors (maximum likelihood)

| #factors | loglik    | df_m | df_r | AIC      | BIC      |
|----------|-----------|------|------|----------|----------|
| 1        | -72.72784 | 11   | 44   | 167.4557 | 196.1126 |
| 2        | -37.78287 | 21   | 34   | 117.5657 | 172.2743 |
| 3        | -20.93227 | 30   | 25   | 101.8645 | 180.0196 |

the model with 3 factors is a Heywood case

. \*Matriz de correlacion

. estat common

Correlation matrix of the promax(3) rotated common factors

| Factors | Factor1 | Factor2 | Factor3 |
|---------|---------|---------|---------|
| Factor1 | 1       |         |         |
| Factor2 | .6026   | 1       |         |
| Factor3 | .3512   | .3861   | 1       |

```

-----
. tab grupo

```

| grupo | Freq. | Percent | Cum.   |
|-------|-------|---------|--------|
| 0     | 100   | 50.00   | 50.00  |
| 1     | 100   | 50.00   | 100.00 |
| Total | 200   | 100.00  |        |

```

. keep if grupo==1
(100 observations deleted)

```

```

. tab grupo

```

| grupo | Freq. | Percent | Cum.   |
|-------|-------|---------|--------|
| 1     | 100   | 100.00  | 100.00 |
| Total | 100   | 100.00  |        |

```

. sem (Secrecionymalolor -> prellassecrecionesoeldrena, ) (Secrecionymalolor -> pre2elmalolordeloido, ) (Problemasauditivos ->
> pre3losproblemasparaairen, ) (Problemasauditivos -> pre4losproblemasparaaircua, ) (Problemasauditivos -> pre5molestiasdentroy
> alredez, ) (Problemasauditivos -> pre6losmareososensaciónde, ) (Problemasauditivos -> pre7tinnitusoruidoseneloi, ) (Impactosa
> ludestilovida -> pre8conquéfrecuenciaoque, ) (Impactosaludestilovida -> pre9realizarsusactividades, ) (Impactosaludestilovida
> -> pre10debidoadsuproblemaene, ) (Impactosaludestilovida -> prellconquéfrecuenciaoque, ), covstruct(_lexogenous, diagonal) la
> tent(Secrecionymalolor Problemasauditivos Impactosaludestilovida ) cov( Secrecionymalolor*Problemasauditivos Problemasauditiv
> os*Impactosaludestilovida Impactosaludestilovida*Secrecionymalolor) nocapslatent

```

Endogenous variables

```

Measurement: prellassecrecionesoeldrena pre2elmalolordeloido pre3losproblemasparaairen pre4losproblemasparaaircua
pre5molestiasdentroyalredez pre6losmareososensaciónde pre7tinnitusoruidoseneloi pre8conquéfrecuenciaoque
pre9realizarsusactividades pre10debidoadsuproblemaene prellconquéfrecuenciaoque

```

Exogenous variables

```

Latent: Secrecionymalolor Problemasauditivos Impactosaludestilovida

```

Fitting target model:

```

Iteration 0: log likelihood = -1855.1005
Iteration 1: log likelihood = -1853.8304
Iteration 2: log likelihood = -1853.4373
Iteration 3: log likelihood = -1853.1282
Iteration 4: log likelihood = -1853.112 (backed up)
Iteration 5: log likelihood = -1853.108 (backed up)
Iteration 6: log likelihood = -1853.1078 (backed up)
Iteration 7: log likelihood = -1853.1077 (backed up)
Iteration 8: log likelihood = -1853.1076 (backed up)
Iteration 9: log likelihood = -1853.1076 (backed up)
Iteration 10: log likelihood = -1853.1076 (backed up)
Iteration 11: log likelihood = -1853.1076 (backed up)
Iteration 12: log likelihood = -1853.1076 (backed up)
Iteration 13: log likelihood = -1853.1076 (backed up)
Iteration 14: log likelihood = -1853.1076 (backed up)
Iteration 15: log likelihood = -1853.1076 (backed up)
Iteration 16: log likelihood = -1853.1076 (backed up)
Iteration 17: log likelihood = -1853.1076 (backed up)
Iteration 18: log likelihood = -1853.1076 (backed up)
Iteration 19: log likelihood = -1853.1076 (backed up)
Iteration 20: log likelihood = -1853.1076 (backed up)
Iteration 21: log likelihood = -1853.1076 (backed up)
Iteration 22: log likelihood = -1853.1076 (backed up)
Iteration 23: log likelihood = -1853.1076 (backed up)
Iteration 24: log likelihood = -1853.1076 (backed up)
Iteration 25: log likelihood = -1853.1076 (backed up)
Iteration 26: log likelihood = -1853.1076 (backed up)
Iteration 27: log likelihood = -1853.1076 (backed up)
Iteration 28: log likelihood = -1853.1076 (backed up)
Iteration 29: log likelihood = -1853.1076 (backed up)
Iteration 30: log likelihood = -1853.1076 (backed up)
Iteration 31: log likelihood = -1853.1076 (backed up)
Iteration 32: log likelihood = -1853.1076 (backed up)
Iteration 33: log likelihood = -1853.1076 (backed up)
Iteration 34: log likelihood = -1853.1076 (backed up)
Iteration 35: log likelihood = -1853.1076 (backed up)
Iteration 36: log likelihood = -1853.1076 (backed up)
Iteration 37: log likelihood = -1853.1076 (backed up)
Iteration 38: log likelihood = -1853.1076 (backed up)
Iteration 39: log likelihood = -1853.1076 (backed up)
Iteration 40: log likelihood = -1853.1076 (backed up)
Iteration 41: log likelihood = -1853.1076 (backed up)
Iteration 42: log likelihood = -1853.1076 (backed up)
Iteration 43: log likelihood = -1853.1076 (backed up)
Iteration 44: log likelihood = -1853.1076 (backed up)
Iteration 45: log likelihood = -1853.1076 (backed up)
Iteration 46: log likelihood = -1853.1076 (backed up)
Iteration 47: log likelihood = -1853.1076 (backed up)

```





|                                                |  |           |               |       |       |          |          |
|------------------------------------------------|--|-----------|---------------|-------|-------|----------|----------|
| Problemasauditivos                             |  | .9259157  | .0830166      | 11.15 | 0.000 | .7632062 | 1.088625 |
| _cons                                          |  | 3.97      | .1193837      | 33.25 | 0.000 | 3.736012 | 4.203988 |
| -----                                          |  |           |               |       |       |          |          |
| pre5molestiasdentroyalreded                    |  |           |               |       |       |          |          |
| Problemasauditivos                             |  | .9112768  | .1373528      | 6.63  | 0.000 | .6420702 | 1.180483 |
| _cons                                          |  | 3.33      | .1654889      | 20.12 | 0.000 | 3.005648 | 3.654352 |
| -----                                          |  |           |               |       |       |          |          |
| pre6losmareososensaciónde                      |  |           |               |       |       |          |          |
| Problemasauditivos                             |  | .8518748  | .158591       | 5.37  | 0.000 | .5410422 | 1.162707 |
| _cons                                          |  | 2.64      | .1813413      | 14.56 | 0.000 | 2.284578 | 2.995422 |
| -----                                          |  |           |               |       |       |          |          |
| pre7tinnitusoruidoseneloí                      |  |           |               |       |       |          |          |
| Problemasauditivos                             |  | 1.082396  | .126303       | 8.57  | 0.000 | .8348471 | 1.329946 |
| _cons                                          |  | 3.61      | .1623         | 22.24 | 0.000 | 3.291898 | 3.928102 |
| -----                                          |  |           |               |       |       |          |          |
| pre8conquéfrecuenciaoque                       |  |           |               |       |       |          |          |
| Impactosaludestilovida                         |  | 1         | (constrained) |       |       |          |          |
| _cons                                          |  | 2.41      | .1837167      | 13.12 | 0.000 | 2.049922 | 2.770078 |
| -----                                          |  |           |               |       |       |          |          |
| pre9realizarsusactividades                     |  |           |               |       |       |          |          |
| Impactosaludestilovida                         |  | .6591434  | .1445589      | 4.56  | 0.000 | .3758132 | .9424736 |
| _cons                                          |  | 2.98      | .1725172      | 17.27 | 0.000 | 2.641873 | 3.318127 |
| -----                                          |  |           |               |       |       |          |          |
| pre10debidoasuproblemaene                      |  |           |               |       |       |          |          |
| Impactosaludestilovida                         |  | .5342918  | .139178       | 3.84  | 0.000 | .2615079 | .8070757 |
| _cons                                          |  | 4.24      | .16737        | 25.33 | 0.000 | 3.911961 | 4.568039 |
| -----                                          |  |           |               |       |       |          |          |
| pre11conquéfrecuenciaoque                      |  |           |               |       |       |          |          |
| Impactosaludestilovida                         |  | .507158   | .0945417      | 5.36  | 0.000 | .3218597 | .6924564 |
| _cons                                          |  | 3.02      | .1221846      | 24.72 | 0.000 | 2.780523 | 3.259477 |
| -----                                          |  |           |               |       |       |          |          |
| var(e.pre11assecrecionesoeldrena)              |  | -1.00e-09 | .4045776      |       |       | .        | .        |
| var(e.pre2elmalolordeloido)                    |  | 2.23764   | .3851168      |       |       | 1.596949 | 3.135373 |
| var(e.pre3losproblemasparaoíren)               |  | .3809856  | .0753481      |       |       | .2585623 | .5613736 |
| var(e.pre4losproblemasparaoírca)               |  | .3428688  | .0707628      |       |       | .2287985 | .5138103 |
| var(e.pre5molestiasdentroyalreded)             |  | 1.690234  | .2557145      |       |       | 1.256519 | 2.273655 |
| var(e.pre6losmareososensaciónde)               |  | 2.372272  | .350767       |       |       | 1.775435 | 3.169744 |
| var(e.pre7tinnitusoruidoseneloí)               |  | 1.154992  | .1869275      |       |       | .8410425 | 1.586135 |
| var(e.pre8conquéfrecuenciaoque)                |  | 1.224601  | .3320231      |       |       | .7197975 | 2.083429 |
| var(e.pre9realizarsusactividades)              |  | 2.041856  | .3449438      |       |       | 1.466311 | 2.843308 |
| var(e.pre10debidoasuproblemaene)               |  | 2.18735   | .3354564      |       |       | 1.619482 | 2.954338 |
| var(e.pre11conquéfrecuenciaoque)               |  | .9397573  | .1680468      |       |       | .6619183 | 1.334219 |
| var(Secrecionymalolor)                         |  | 2.148957  | .5007547      |       |       | 1.361065 | 3.392943 |
| var(Problemasauditivos)                        |  | 1.262513  | .2376521      |       |       | .8729874 | 1.825844 |
| var(Impactosaludestilovida)                    |  | 2.15058   | .5208454      |       |       | 1.337841 | 3.457058 |
| -----                                          |  |           |               |       |       |          |          |
| cov(Secrecionymalolor,Problemasauditivos)      |  | .8679783  | .2073019      | 4.19  | 0.000 | .4616742 | 1.274283 |
| cov(Secrecionymalolor,Impactosaludestilovida)  |  | 1.125302  | .2978059      | 3.78  | 0.000 | .5416134 | 1.708991 |
| cov(Problemasauditivos,Impactosaludestilovida) |  | 1.057588  | .2446189      | 4.32  | 0.000 | .5781436 | 1.537032 |

LR test of model vs. saturated: chi2(41) = 62.75, Prob > chi2 = 0.0160  
convergence not achieved  
r(430);

. estimate store modelo3factred

. estat gof, stats(all)

| Fit statistic        | Value    | Description                              |
|----------------------|----------|------------------------------------------|
| -----                |          |                                          |
| Likelihood ratio     |          |                                          |
| chi2_ms(41)          | 62.753   | model vs. saturated                      |
| p > chi2             | 0.016    |                                          |
| chi2_bs(55)          | 451.473  | baseline vs. saturated                   |
| p > chi2             | 0.000    |                                          |
| -----                |          |                                          |
| Population error     |          |                                          |
| RMSEA                | 0.073    | Root mean squared error of approximation |
| 90% CI, lower bound  | 0.032    |                                          |
| upper bound          | 0.108    |                                          |
| pclose               | 0.147    | Probability RMSEA <= 0.05                |
| -----                |          |                                          |
| Information criteria |          |                                          |
| AIC                  | 3778.215 | Akaike's information criterion           |
| BIC                  | 3872.001 | Bayesian information criterion           |
| -----                |          |                                          |
| Baseline comparison  |          |                                          |
| CFI                  | 0.945    | Comparative fit index                    |
| TLI                  | 0.926    | Tucker-Lewis index                       |
| -----                |          |                                          |
| Size of residuals    |          |                                          |
| SRMR                 | 0.063    | Standardized root mean squared residual  |
| CD                   | 1.000    | Coefficient of determination             |

. log close  
name: <unnamed>

log: C:\Users\smmor\Desktop\Análisis factorial adicional COMQ-12 03 jul 2020.log  
log type: text  
closed on: 3 Jul 2020, 20:42:15

---
